# Supplementary material for: Genome-Wide Analyses of Aspartic Proteases on Potato Genome (Solanum tuberosum): Generating New Tools to Improve the Resistance of Plants to Abiotic Stress
Source: MDPI journal article supplement (doi:10.3390/plants11040544), 2022-02-18
Supplement: s1 [file s1]

**Table S1.** Partial amino acid sequence alignment of *Solanum tuberosum* APs and *Arabidopsis thaliana* APs (with known function) and six reference APs. Sequences surrounding the first and second catalytic aspartate and the C-terminal side of the protease domain from A) Typical aspartic proteases; B) Nucelline-like; C) atypical aspartic proteases. The alignment was done using mafft [1] with default parameters with 100 maxiteration and it was visualized in Bioedit [2].

(a) Typical aspartic proteases

| Protein ID     | FIRST CATALYTIC ASPARTATE                             | SECOND CATALYTIC ASPARTATE    | C-TERMINAL END                            |
|----------------|-------------------------------------------------------|-------------------------------|-------------------------------------------|
| StAP3.1        | IVYVKNYMDVQYFAEIGIGSPPOHFAV-<br>VEDTASSNLWVPSSKC      | GCPAIVDTGTSELAG-<br>PTTILTQI  | PLWVLGDVFLRAYHTVFD FGN---<br>LQVGFAESA--- |
| StAP9.3        | IVYIKNYQDVQYFAE-<br>ISIGSPPOHETTVVEDTGSSNLWVPSSKC     | GCPAIVDTGTAFIS-<br>GPTTILTQI  | PLW-----<br>-----                         |
| Pro-Car-dosinA | VVALTNDRDTSYFGEI-<br>GIGTPPOKETVIFDTGSSVLWVPSSKC      | GCOAFADSGTSLSGP<br>TAIVTQI    | PLWILGDVFMRPYHTVFDYGN---<br>LLVGFAEAA---  |
| StAP7.5        | IIALKNYLDAQYFGEISIGSPPOKETVIFD<br>TGSSNLWVPSAKC       | GCSAIVADSGTSLLAG-<br>PTTIITQI | PLWILGDVFMGRYHTVFDSEK---<br>MRVGFAEAA---  |
| Phytop sin     | IIVALK-<br>NYMAQYFGEIGVGTPPOKETVIFDTGSS<br>NLWVPSAKC  | GCAIVADSGTSLLAG-<br>PTAITTEI  | PLWILGDVFMGPYHTVFDYGK---<br>LRIGFAKAA---  |
| StAP2.4        | IIVALK-<br>NYMDAQYFGEIGVGTPPOKETVIFDTGSS<br>NLWVPSAKC | GCSAIVADSGTSLLAG-<br>PTTVITMI | PLWILGDVFMGRYHTVFDSEK---<br>LRVGFAEAA---  |
| StAP2.2        | IIVALK-<br>NYMDAQYFGEIGVGTPPOKETVIFDTGSS<br>NLWVPSSKC | GCSAIVADSGTSLLAG-<br>PTTVITMI | PLWILGDI FMGRYHTVFDYGK---<br>LRVGFAEAA--- |
| StAP1.6        | IIVPLKNYLDAQYFGEIGIGSPPOKFKII-<br>FDTGSSNLWVPSSKC     | GCAIVDSGTSLLAG-<br>PTTIVTQI   | PLWILGDVFMGPYHTVFDYGK---<br>SQVGFAEAA---  |
| StAP3          | IIVPLKNYLDAQYFGEI-<br>GIGSPPOKFKVIFDTGSSNLWVPSSKC     | GCAIVDSGTSLLAG-<br>PTTIVAQI   | PLWILGDVFMGPYHTVFDYGK---<br>SQVGFAEVHNSL  |

(b) Nucelline-like aspartic proteases.

| Protein ID         | FIRST CATALYTIC ASPARTATE                         | SECOND CATALYTIC ASPARTATE | C-TERMINAL END                           |
|--------------------|---------------------------------------------------|----------------------------|------------------------------------------|
| StAP6.5            | GNIHSEGLYYTYMLVGNPPR--<br>PYFLDIDTGS DLMWIQCDAP   | VFD SGSTY-<br>TYFTDQAY     | ILGDISLRGQLFVYD NVNQKIGWIRSNCE-----<br>R |
| NP_564539.1_AP CB1 | GNVYPDGLYYTRILVVGK-<br>PEDGQYHL DDTGS ELTWIQCDAP  | LEDTGSSYT-<br>YFPNQAY      | ILGDISMRGHLIVYD NVKRRIGWMKSDCV-----<br>R |
| StAP6.3            | GNVYPICGYQVTLVVGQPPK--PYFFD-<br>IDTGS DLTWLQCDAP  | VFD SGSTFT-<br>YFSSKAY     | LIGDISLLDKMVYD NEKKQIGWL PANCK-----<br>R |
| StAP6.1            | GNVYPKGYQVTLVVGQPPK--<br>PYFLDIDTGS DLTWLQCDAP    | ILD SGSTFT-<br>YFNSKAY     | LIGDISMLDKLVIYD NEKKQIGWAPANCN-----<br>R |
| StAP6.2            | GNVYPLGYYYVQLNIGQPSR--<br>PEFLDPDTGS DLTWLQCDAP   | VFD SGSS-<br>FSYLNHAHY     | LIGDISMQDKMVIYD NEKQAIGWTSANCD-----<br>R |
| Nucellin           | GNVYPVGHFYATLNIGEPAK--<br>PYFLDVIDTGS NL TWLECHHP | VFD SGSTY-<br>THVPAQIY     | LIGAVTMQDLFVIYD NEKKQLGWVRAQCD-----<br>R |
| OsAP2              | GNVYPIGHFVETMNI SDPAK--<br>PYFLDIDTGS TL TWLQCDYP | IFD SGATY-<br>TYFALQPY     | LIGGITMLDQMVYD SERSLLGWVNYQCD-----<br>R  |
| StAP1.5            | DLLINGYYTTHIWI GTTPQ--<br>KFALIVDTGSTVTVVPCSS-    | ILD SGTAY<br>LPEAVF        | LLGGIVVRNTLVTVYDRENERIGFWKTNCS-<br>ELWDR |

(c) Atypical aspartic proteases

| Protein ID | FIRST CATALYTIC ASPARTATE             | SECOND CATALYTIC ASPARTATE          | C-TERMINAL END                           |
|------------|---------------------------------------|-------------------------------------|------------------------------------------|
| StAP1.3    | EYFTRIGVGTPPK-<br>YVYVLDITGS DVVWIQCS | -AGDGGVIVDSGTSVTRL-<br>TRPAVALRDSFR | SGLSIIIGNIQQQGFRVVDLAGSRLG-<br>FAPRGCA-- |

|                        |                                          |                                            |                                            |
|------------------------|------------------------------------------|--------------------------------------------|--------------------------------------------|
| StAP1<br>0.1           | EYFTRIGIGTK-YVYL-<br>VLDTGSDIWIQCLP      | -EGNGGVIVDSGTSVTRL-<br>TRPGYIAVRDAFR       | GGLSIIIGNIQQQGFRVVFEDLAGSRIG-<br>FAPRGCSY- |
| StAP6.<br>6            | EYFARLGVGEPAK-<br>EFYMAIDTGS DINWLOCEP   | -NGRGGIIVDSGTAVTRLQS-<br>SAYNAIRDTFV       | ESMSIICNVQQQGTRVSYDLT-<br>NNLVGFSLDKC---   |
| StAP3.<br>5            | EYFTRIGLGQPVK-<br>EYYMVLDTGSDITWVQCEP    | -SGSGGIIVDSG-<br>TAVTRLKSTAVNTLRDSFV       | GSLSIICNVQQQGTRVSYDLANNLVGE-<br>SPDKC---   |
| StAP2.<br>1            | EYFVRIGVGSPVR-<br>QQYMLIDAGSDIWWVQCQP    | -EGDGGVVMDTGTAVTRL-<br>PQEAYVAFRDAFA       | TRLSIICNVQQEGIQI-<br>SIDGANGFVGFGNIC---    |
| StAP4.<br>1            | EYFVRIGVGSPAK-<br>NQYMLDSGSDIWWVQCQP     | -LGDGGVVMDTG-<br>TAVTRLPSEAYVAFRDAFI       | SKLSIICNVQQEGI-<br>QISFDGANGFVGFGNIC---    |
| StAP5.<br>6            | EFLMQISIGSPSE-SYNAIM-<br>DTGSDLIWTQCKP   | -DGTGGMIL-<br>IDSGTTITYLEESAFSLLKKEF<br>S  | SGMSIFCNVQQQNMVI-<br>HDLDKETLSEVPTQCDKL    |
| Ne-<br>pen-<br>thesinI | EYLMNISIGTEAQ-PFSAIM-<br>DTGSDLIWTQCKP   | -NGTGGIILIDSGTTLTY-<br>FVNNAYQSVRQEFI      | QGMSIFGNVQQQNMVLVYDTGNSVVSFAS<br>AQCAS     |
| StAP7.<br>4            | EYFMDVFGVTPPK-<br>HFSLILDTGSDINWLOQVCP   | -EGVGGTIIDSGTTLTY-<br>FAEPAYEIIKEAFV       | SALSIIICNVQQQNFHLYDTKRS-<br>RLGYAPTRCADA   |
| StAP5.<br>2            | EYFMDVFGVTPPK-<br>HFSLILDTGSDINWLOQVCP   | -QGVGGTIIDSGTTLTY-<br>FIEPAYEIIKEAFV       | SAMSIICNVQQQNFHLYDTKRS-<br>RLGYAPTKCADA    |
| StAP1.<br>1            | EYLMRYSIGTTPPV-<br>HTLGVAIDTGS DITWTOCLP | --GEGNIILIDSGTVLTLF-<br>STEINVKLES MVK     | YGGQIFCNIAQMNFVGYDLK-<br>NKRVSFKATDCSK-    |
| NP_19<br>8319          | EYLMNVSIGTTPPF-<br>PIMAIADTGS DILWTOCAP  | --SEGNIILIDSGTTLTL-<br>LLPTEFYSELEDAVA     | PSFSIYCINVAQ-<br>MNFLVGYDTVSKTVSEKPTDCAKM  |
| StAP8.<br>10           | DYLMKIIAIGTTPR-<br>KTYAILDTGS EITWIOCKP  | DEDLGNIIIDSGTTLTL-<br>PENFYNKFESILV        | GQYGVYCNLAQMN-<br>FLIGYDLVNRKLSFLPSDCTKH   |
| StAP8.<br>3            | EYLMKLSIGTTPPV-<br>EIVAIAIDTGS DITWTOCKP | GGEEGNIILIDSGTTLTL-<br>FLPNDFYSSLESTLV     | -----<br>-----                             |
| StAP8.<br>4            | EYLMKLSIGTTPPV-<br>EIVAIAIDTGS DITWTOCMP | DGQAGNIILIDSGTTLTL-<br>PNDFYSNLESTLV       | DEIAIFGNLAQGNFLIEYDL-<br>VANKISFQPTDCTKY   |
| StAP8.<br>1            | ---MKISIGTTPPI-<br>DIFAFADTGS DITWTOCEP  | --PQGNIIIDSGTTLTL-<br>LVPVDFYAKLEKTLV      | EEVSIILGNLAQMNLLIGFDL-<br>VANKVSEFLPTDCTKH |
| StAP8.<br>6            | EFLMKISIGTTPPI-DTFVI-<br>ADTGS DITWTOCKP | GYDRGNIILIDSGTTLTYVPDVF<br>YLNLESLLI       | NQISILGNLAQANFLIGFDLEANK-<br>MSEKPTDCTKY   |
| StAP8.<br>5            | EFLMKISIGTTPPI-DTFVI-<br>ADTGS DITWTOCEP | GDDLGNIL-<br>VIDSGTTLTYVPDGFYLN-<br>LESLLM | NQISILGNLAQAN-<br>FLIGYDLKAYKVSSEKPTDCTKY  |
| StAP8.<br>2            | EYLMKISIGTTPPI-ETLVI-<br>ADTGS DITWTOCKP | GYDRGNIILIDSGTTLTYVPDGF<br>YLNLESLLM       | NQISILGNLAQANFLIGYDL-<br>KANRVSEKRTDCTKY   |
| StAP1.<br>2            | VYLTKISIGTKPS-<br>AKLVAVDTGSDIWIQCEP     | -HKGGKIIIDSGTTFITFLPTH-<br>MYSEMETIMK      | KHLPITCNIAQTNFFVAYDLD-<br>NKTVSEKPKQICAKL  |
| StAP3.<br>4            | NYIVTVTLG--GR-<br>NMTVIVDTGS DITWTOCQP   | --GKSGFLIDSGTIVTRL-<br>PPSIYKAVKAEFL       | GEIGIICNFQQRNTRVYDTKQSQVG-<br>FAKETCSFM    |

|                       |                                            |                                           |                                                    |
|-----------------------|--------------------------------------------|-------------------------------------------|----------------------------------------------------|
| StAP6.<br>4           | NYIVTVTLG--GR-<br>NTTVVDTGSDLTWVQCQP       | --GKSGMVIDSGTVITRL-<br>PPTIYKAVKAEFL      | DEIGIIGNYQQKNTRVIYDIKQSQVG-<br>FAKETCSF-           |
| NP_56<br>5219         | NYIVTVELG--GK-NMSLIV-<br>DTGSDLTWVQCQP     | --GR-GILIDSGTVITRL-<br>PPSIYKAVKIEFL      | NEVGLICNYQQKNQRVI-<br>YD TTQERLGIVGENCRV-          |
| StAP8.<br>7           | NYIVTIGIGTPKK-DLT-<br>LIFDTGSDLTWTQCEP     | --KNAG-<br>TIIDSGTVITRLPSTAYANMRA<br>TFR  | DSIGIFGN-<br>TQQQTMEIVYDVAGEKLGFGYGGCT--           |
| StAP5.<br>1           | QYFVDLRLGTPPQ-<br>RLLLVADTGSDELVWVSCSA     | -LGNGGTVMDSGTTLT-<br>FLAEPAYRRIVQAFK      | SGFSVIGNLMQQGFMFEFDRDQSRIGFSR<br>HGCG--            |
| StAP1<br>2.1          | NYVVRVKMGTPGQ-<br>QMVMVLDTSIDAEVPCGG       | -NTGAG-<br>TVIDSGTVITRFVQPAYEAI RD<br>EFR | SVLNVIANLQQQNLRLIM-<br>FDTANSRVLGIAHEVCN--         |
| StAP4.<br>4           | NYVVRAKIGTTPGQ--<br>LMFMVLDTSSDTAWVPCSG    | -NTGAGTVIDSGTVITRFVE-<br>PIYNATRDEFR      | SVLNVIANLQQQNLRLIFDTANSRLGI-<br>ARELCN--           |
| NP_56<br>3851A<br>ED3 | NYVVRAKIGTTPGQ--<br>LMFMVLDTSIDAVWLPCSG    | -NSGAGTVIDSGTVITRF A-<br>QPVYEAIRDEFR     | AVLNVIANLQQQNL-<br>RLIFDVPNSRLGIAPEPCN--           |
| StAP1.<br>4           | TVIVKAKIGTTPQ--TLLVALD-<br>NSNDFSWFPCGG    | -NTGAGTVIDSGTVITRFIVE-<br>PAYTAVRNEFR     | SVLNV I-<br>ASWQQQNRRLIFDVPNSRVGVARETCS--          |
| NP_18<br>7876N<br>ANA | QYFTEIRVGTPEAK--<br>KFRVVDTGSELTWVNCRY     | -TSGGGTVIDSGTSLT-<br>LLADAAYKQVVTGLA      | PATNVIGNIMQQNYLWEEFDL-<br>MASTLSFAPSACT--          |
| StAP6.<br>7           | GYSIALSFGTTPPQ--KIPFIM-<br>DTGSNFVWFPCCT   | -NGNGGSIVDSGTT-<br>FTFMNRGVTEPVLDAFV      | GPSIILGNFQMQNYLVEFDLKD-<br>NEKFGEKQMQCK--          |
| StAP1<br>1.3          | GYSITLFPFGTTPPQ---<br>MPFVMDTGSSSFVWFPC TK | -KGNGGTIVDSGTT-<br>FTFLNHDIEVPVMNAFV      | GPSIILGNFQMQNFVEFDLKNMFG-<br>FRDQVCK--             |
| StAP8.<br>11          | DYTLSESLGSQ----<br>TISLYMDTGSDVWVLPCHP     | -RGNGGMVVDSGTTF T-<br>MLPLKFYETVVTEFV     | GPAGILGNFYQQGFVVYDLEKKRVG-<br>FAKRKCA--            |
| StAP9.<br>1           | TLTVSLSVGTPPQ--<br>NVTMVLDTGSELSWLHSN-     | -<br>TGAGQTMVDSGTQFTFL LGPAY<br>TALRSEFL  | IEAYIIGHHHQQNVWVEYDLEKSRI G-<br>FAQVQC NIA (8)     |
| NP195<br>839PC<br>SC1 | TLTVTLTVGTTPQ--<br>NISMVLDTGSELSWLRCN-     | -<br>TGAGQTMVDSGTQFTFL LGPVY<br>TALRSHFL  | MEAYVICHHHQQNMWVEFDLQRS-<br>RIGLAPVECDVS (8)       |
| StAP2.<br>3           | SLTVSLSIGSPPQ--<br>QVVMVLDTGSELSWLHCK-     | -<br>TGAGQTMVDSGTQFTYLLGPAY<br>TALKNEFI   | VAAYII-<br>GHHHQQNFWMVEFDLANSRVGLAQVS-<br>CELA (8) |
| StAP1<br>1.1          | ALIVTLPIGTTPQ--<br>DQQMVLDTGSQLSWIQCN-     | -<br>GGSGQTMIDSGTQYTFLLVEEAY<br>SKVRDEVV  | IASNIIICNFHQQLNWVEFDLS-<br>NKRVGFGKVECK---         |
| StAP5.<br>3           | -----<br>MVLDTGSQLSWIQCH-                  | -GGSGQTVDSGTEY-<br>TFLVEEAYNKVREEIV       | IASNIIICNFHQQLNWVEFDLRN-<br>RRVGF GKGECSMQV        |
| StAP7.<br>1           | EYVASFLIGTQMI--<br>KNYLLLDTGSDLTWVQC GP    | -MMNGGMFVDTGTS                            | SERSVLGMTQLQGVGLT FDTISSTLSFD-<br>IDACD--          |

|              |                                                                                                 |                                                                                   |                                                                                                 |
|--------------|-------------------------------------------------------------------------------------------------|-----------------------------------------------------------------------------------|-------------------------------------------------------------------------------------------------|
| StAP7.<br>2  | <div> <div>EYIAT-</div> <div>FNLGTDHDKFKRYLLVDTGSDLV</div> <div>WVQC</div> <div>GP</div> </div> | <div> <div>-AGDGGVIVDSGTSVTRL-</div> <div>TRPAYVALRDSFR</div> </div>              | <div> <div>NPVTIIIGSYQLQGVGLTFD</div> <div>TATDTLSFD-</div> <div>IDACGAD</div> </div>           |
| StAP7.<br>3  | <div> <div>EYVATFTIGAEET--</div> <div>KSFLLIDTGSDLVWQCKP</div> </div>                           | <div> <div>-EGNGGVIVDSGTSVTRL-</div> <div>TRPGYIAVRDAFR</div> </div>              | <div> <div>QNVATIGNHQLQGVGLTFD</div> <div>TGTD-</div> <div>TLSEDLDA</div> <div>---</div> </div> |
| StAP8.<br>9  | <div> <div>GYTVKIGLGTGRQ--</div> <div>NFELMFDTGSPATWVRCKS</div> </div>                          | <div> <div>-IGNGGVIVDSGTSVTRLIR-</div> <div>PAYIAMRDAFR</div> </div>              | <div> <div>DNLSIIGSVQQRGMNVIYDLKQKRIGFG-</div> <div>TNCP</div> <div>TY</div> </div>             |
| StAP8.<br>8  | <div> <div>LFTVKISLGSPQQ--YYSLIV-</div> <div>DTGSRWTWVR</div> <div>CRF</div> </div>             | <div> <div>-TGNGGVIVDSGTSVTRL-</div> <div>TQPAYVALRDAFR</div> </div>              | <div> <div>ESYSIIGIVQQRGFNVLYDLEWKTIGFG-</div> <div>TNCT--</div> </div>                         |
| StAP1<br>1.2 | <div> <div>LYFTRVQLGSPPK--</div> <div>EFYVQIDTGSDLVWVSCAS</div> </div>                          | <div> <div>-NGRGGIIVDSGTAVTRLQS-</div> <div>SAYNALRDTFV</div> </div>              | <div> <div>QGLTILGDLVLKDKIIVYDLAQQRIG-</div> <div>WANYDCSQA (53)</div> </div>                   |
| StAP1<br>0.2 | <div> <div>FYYTKVQLGSPPR--</div> <div>EYNVQIDTGSDILWVTCGS</div> </div>                          | <div> <div>-SGSGGVILDCG-</div> <div>TAVTRLQQTAYNSLRDAFL</div> </div>              | <div> <div>LGLTILGDLVLKDKIIVYDLARQRIG-</div> <div>WAEYDCSSP (65)</div> </div>                   |
| StAP9.<br>2  | <div> <div>LYFTKVRIGTTPR--</div> <div>EYNVQIDTGSDILWVTCSS</div> </div>                          | <div> <div>-SGSGGIITIDSG-</div> <div>TAVTRLQTEIYNLSLRDSFV</div> </div>            | <div> <div>QGVITILGDLVLKDKIIVYDLARQRIG-</div> <div>WTDYDCSSS (53)</div> </div>                  |
| StAP1<br>0.3 | <div> <div>LYYTKVKGSPPR--</div> <div>EYNLLIDTGSEISWIACSS</div> </div>                           | <div> <div>-LGDGGVIMDTG-</div> <div>TAVTRLPSSEAYVAFRDAFI</div> </div>             | <div> <div>PSLTVLGDIALRDKSIVYDLAHQRIG-</div> <div>WADHDCSLP (34)</div> </div>                   |
| StAP3.<br>3  | <div> <div>LYFTKLSIGTTPSK--DY-</div> <div>HVQVDTGSDILWVNCAG</div> </div>                        | <div> <div>-DGTGGM-</div> <div>IDSGTTITYLEETAFFKVLKEEF</div> <div>T</div> </div>  | <div> <div>DELYLLGDLVLSNKLIVLYDLEKKTL-</div> <div>GWTDYDCSSN (42)</div> </div>                  |
| StAP4.<br>2  | <div> <div>LYYTKLTIIGTTPSK--DY-</div> <div>HVQVDTGSDILWVNCAG</div> </div>                       | <div> <div>-NGTGGIIDSGTTITY-</div> <div>FVNNAYQSVRQEFI</div> </div>               | <div> <div>KEITLLGDLVLSNKLIVLYDLENQSIG-</div> <div>WTEYNYI--</div> </div>                       |
| StAP5.<br>5  | <div> <div>LYYTKISIGTTPSR--</div> <div>DFHVQVDTGSDILWVNCAS</div> </div>                         | <div> <div>-EGVGGTIDSGTTLSY-</div> <div>FAEPAYEIIKEAFV</div> </div>               | <div> <div>SEITLLGDLALSNNKLIVLYDIENQITIG-</div> <div>WTEYDCSST (47)</div> </div>                |
| StAP5.<br>4  | <div> <div>LYFAEIGIGTTPN--</div> <div>NYEVQVDTGSDIMWVNCA</div> </div>                           | <div> <div>--GEGNIIDSGTVLTTLF-</div> <div>STEINVKLES</div> <div>SMVK</div> </div> | <div> <div>WNLIIVFGDLVLSNRLIVLYDLENQAIG-</div> <div>WTEYNCSN (46)</div> </div>                  |
| StAP9.<br>4  | <div> <div>LYYAKIGIGTTPSN--</div> <div>GYVQVDTGSDIMWVNCVG</div> </div>                          | <div> <div>--GEGNIVIDSGTTLT-</div> <div>LLPSNFYELLESVVA</div> </div>              | <div> <div>WNLTIVFGDLVLSNKLIVLYDLEKQAIG-</div> <div>WTEYNCSSS (46)</div> </div>                 |
| StAP2.<br>6  | <div> <div>LYYANVTVGSPGL--</div> <div>SFLVALDTGSDLEFWLPCD-</div> </div>                         | <div> <div>DEDLGNIIIDSGTTLTTL-</div> <div>PENFYNKFESILV</div> </div>              | <div> <div>--VNIIGNFMTGYRVLYDREKMVL-</div> <div>GWKASDCYDS (84)</div> </div>                    |
| StAP3.<br>2  | <div> <div>LYYANVTVGTPGL--</div> <div>SFLVALDTGSDLEFWLPCN-</div> </div>                         | <div> <div>GGEEGNIIDSGTTLT-</div> <div>FLPNDFYSSLESTLV</div> </div>               | <div> <div>--VNIIGNFMTGYQVLYDREKMVL-</div> <div>GWKPSDCYDS (80)</div> </div>                    |
| StAP2.<br>5  | <div> <div>LYYTVTLGTPEGL--</div> <div>KFLVALDTGSDLEFWVPCE-</div> </div>                         | <div> <div>GDDLGN-</div> <div>VIDSGTTLTYVPDGFYLN-</div> <div>LESLLM</div> </div>  | <div> <div>--LNIIGNFMTGYRFVLYDREKIIL-</div> <div>GWKKFDCYDY (69)</div> </div>                   |
| StAP4.<br>3  | <div> <div>LHYMWVDIGTPNV--SFLVAL-</div> <div>DAGSDLEFWVPCE-</div> </div>                        | <div> <div>SKRTGNIIDSGTTLT-</div> <div>LLDSGFYDDFGTAVE</div> </div>               | <div> <div>-EIGTIGNFMTGYRMVLYDRENKL-</div> <div>GWSRSDCEDL (81)</div> </div>                    |
| StAP0.<br>1  | <div> <div>LHYVVIDIGTPNA--SFLVAL-</div> <div>DAGSDLEFWLPCN-</div> </div>                        | <div> <div>--LEGNIVIDSGTTLTY-</div> <div>FPVSYCNLVRQAVE</div> </div>              | <div> <div>-----</div> <div>-----</div> </div>                                                  |
