# Supplementary material for: Genome-Wide Analyses of Aspartic Proteases on Potato Genome (Solanum tuberosum): Generating New Tools to Improve the Resistance of Plants to Abiotic Stress
Source: MDPI journal article supplement (doi:10.3390/plants11040544), 2022-02-18
Supplement: s1 [file s1]

**Table S2. Segmental duplications.** Data obtained from PGDD (<http://chibba.agtec.uga.edu/duplication/index/downloads> ) Ka/Ks was calculated and duplication date was estimated as was explained in Materials and Methods.

| Block_N° | Block Score | E_value   | Lo-cus_1        | Lo-cus_2        | Ka   | Ks   | Ka/Ks | Approx. duplication date (MYA) |
|----------|-------------|-----------|-----------------|-----------------|------|------|-------|--------------------------------|
| 193      | 222.0       | 9,00E-167 | <i>StAP11.2</i> | <i>StAP9.2</i>  | 0.31 | 1.47 | 0.21  | -106.52                        |
| 33       | 1213.0      | 3,00E-119 | <i>StAP2.5</i>  | <i>StAP3.2</i>  | 0.51 | 1.92 | 0.27  | 139.13                         |
| 56       | 339.0       | 2,00E-146 | <i>StAP3.5</i>  | *nd             | 0.37 | 1.82 | 0.20  | 131.88                         |
| 126      | 400.0       | 5,00E-173 | <i>StAP6.7</i>  | <i>StAP11.3</i> | 0.18 | 0.75 | 0.24  | 54.35                          |
| 30       | 506.0       | 0.0       | <i>StAP2.4</i>  | <i>StAP2.2</i>  | 0.08 | 0.51 | 0.16  | 36.96                          |
| 62       | 644.0       | 0.0       | *nd             | <i>StAP6.4</i>  | 0.15 | 0.69 | 0.22  | 50.00                          |
| 201      | 381.0       | 3,00E-137 | *nd             | <i>StAP4.4</i>  | 0.12 | 0.78 | 0.15  | 56.52                          |

\*nd were detected by HMM search but were eliminated from the *StAP* list.

Ka= non synonymous substitution rate.  
Ks= synonymous substitution rate.
